# Supplementary material for: Preparation and Properties of A Hyperbranch-Structured Polyamine adsorbent for Carbon Dioxide Capture
Source: PubMed Central journal article supplement (PMC5478640; doi:10.1038/s41598-017-04329-w), 2017-06-20
Supplement: 41598_2017_4329_MOESM1_ESM.pdf [file 41598_2017_4329_MOESM1_ESM.pdf]

## Supporting Information

### Preparation and Properties of A Hyperbranch-Structured Polyamine adsorbent for Carbon Dioxide Capture

Hui He <sup>a,c</sup>, Yajie Hu <sup>a</sup>, Shuixia Chen <sup>a,b\*</sup>, Linzhou Zhuang <sup>a</sup>, Beibei Ma <sup>a</sup>, Qinghua Wu <sup>a</sup>

*a. PCFM Lab, School of Chemistry, Sun Yat-Sen University, Guangzhou 510275, PR China*

*b. Materials Science Institute, Sun Yat-Sen University, Guangzhou 510275, PR China*

*c. College of Light Industry and Food Engineering, Guangxi University, Nanning 530004, PR China*

#### Amino content of PP-AM-HBP-NH<sub>2</sub> adsorbent

As showed by the elemental analysis results, no nitrogen and oxygen was detected in PP fibers, but certain amount of nitrogen and oxygen were measured in the PP-AM-HBP-NH<sub>2</sub> fibers due to the introduction of AM and HBP-NH<sub>2</sub> to the PP fibers during the grafting process. Thus, the nitrogen contents (wt%) and oxygen contents (wt%) could be used to estimate the amount of N and O introduced. As we know, only amide group contains oxygen, thus the amide content ( $n_1'$ , mmol/g) of PP-AM-HBP-NH<sub>2</sub> could be calculated from the oxygen mole content (that is, amide content in mmol/g of PP-AM-HBP-NH<sub>2</sub> is equal to the oxygen mole content). The alkyl amino content ( $n'$ , mmol/g) of PP-AM-HBP-NH<sub>2</sub> (amide excluded) was calculated by equation (S1):

$$n' = n_2' - n_1' \quad (S1)$$

---

\* Corresponding author. *E-mail address:* [cescsx@mail.sysu.edu.cn](mailto:cescsx@mail.sysu.edu.cn);

where  $n_2$ ' is the total amino content (mmol/g) of PP-AM-HBP-NH<sub>2</sub>.

Amine titration was used to measure the amino content of PP-AM-HBP-NH<sub>2</sub> fibers. Twenty milligrams of each fiber samples were added to 10 ml HCl (0.05 M). The mixture was shaken for 30 min in a sealed container under N<sub>2</sub> atmosphere and then filtered to remove fiber samples from the solution. Immediately after filtration, the solution was titrated with NaOH (0.05 M) as a titrant with a seal of parafilm that was maintained around both the electrode and the burette, in order to avoid probable HCl evaporation and so change in acid concentration. The PP-AM contains no alkyl amino calculated from amine titration due to only alkyl amino (amide excluded) can react with HCl during the titration process.

Table S1 The amino content of PP-AM-HBP-NH<sub>2</sub>

| N<br>(wt%) | O<br>(wt%) | Amino<br>amount<br>(mmol/g) | Amide<br>content<br>(mmol/g) | Alkyl amino content (mmol/g)           |                                       |                                          |
|------------|------------|-----------------------------|------------------------------|----------------------------------------|---------------------------------------|------------------------------------------|
|            |            |                             |                              | calculated<br>from<br>equation<br>(S1) | calculated<br>from<br>equation<br>(2) | calculated<br>from<br>amine<br>titration |
| 15.36      | 9.32       | 10.97                       | 5.82                         | 5.15                                   | 5.19                                  | 5.12                                     |
| 16.09      | 9.38       | 11.49                       | 5.86                         | 5.63                                   | 5.71                                  | 5.59                                     |
| 16.82      | 9.68       | 12.01                       | 6.05                         | 5.96                                   | 6.04                                  | 5.97                                     |
| 17.56      | 9.98       | 12.54                       | 6.23                         | 6.31                                   | 6.39                                  | 6.35                                     |
| 18.22      | 11.61      | 13.01                       | 7.25                         | 5.76                                   | 5.84                                  | 5.79                                     |
| 18.20      | 12.15      | 13.00                       | 7.59                         | 5.41                                   | 5.46                                  | 5.35                                     |

The alkyl amino content of PP-AM-HBP-NH<sub>2</sub> calculated from equation (2) in the manuscript (based on the weight gain after grafting) and that calculated from equation (S1) and amine titration are very close (Table S1). We believe that the amino or alkyl amino contents of samples calculated from EA are reliable.

Indeed, XPS has been employed to analyze the surface chemical properties of PP-AM-HBP-NH<sub>2</sub> (Figure 6 in the manuscript). Its N 1s peak could be resolved into four peaks at 400.10 eV (13.56%), 399.25 eV (10.07%), 398.65 eV (24.11%), and 398.07 eV (52.26%), which were the characteristics of amide, tertiary amino, primary amino, and secondary amino, respectively. Meanwhile, the absorption peaks of FT-IR spectra at 1573 cm<sup>-1</sup>, 1460 cm<sup>-1</sup>, and 1116 cm<sup>-1</sup> are corresponding to the bending of amino groups (N-H) in PP-AM-HBP-NH<sub>2</sub> (Figure 5). The presence of amide, tertiary amino, primary amino, and secondary amino indicated that the HBP-NH<sub>2</sub> was grafted onto the PP-AM, and the target hyperbranch-structured fibers were successfully prepared.

Table S2 The nitrogen content of PP-AM-HBP-NH<sub>2</sub>

|                                    |       |       |       |       |
|------------------------------------|-------|-------|-------|-------|
| N content measured by EA<br>(wt%)  | 15.36 | 16.82 | 17.56 | 18.22 |
| N content measured by<br>XPS (wt%) | 14.47 | 15.91 | 16.69 | 17.43 |

The nitrogen content of PP-AM-HBP-NH<sub>2</sub> measured by EA and that measured by XPS are very close (Table S2), which further indicated that the alkyl amino contents of samples calculated from EA are reliable.

### **The BET surface area characterization**

The surface area of the PP fibers calculated from the dimensions was 0.0815 m<sup>2</sup>/g. Actually the BET surface area of PP and PP-AM-HBP-NH<sub>2</sub> fibers has also been measured from N<sub>2</sub> adsorption-desorption isotherms at 77.35 K, which were 4.08 m<sup>2</sup>/g and 5.82 m<sup>2</sup>/g, respectively (Table S3). The BET surface area of PP fibers did not change significantly after grafting HBP-NH<sub>2</sub>. Compared with BET surface area of PP fibers, the surface area of the PP fibers calculated from the dimensions was lower than

it, which indicated that a large number of pores exist within the PP fibers.

According to your comment, the BET surface area of PP and PP-AM-HBP-NH<sub>2</sub> fibers has been supplied in the supporting information.

Table S3 The BET surface area and pore volume of PP and PP-AM-HBP-NH<sub>2</sub>

| Materials                 | BET surface area (m <sup>2</sup> /g) | Pore volume (cm <sup>3</sup> /g) |
|---------------------------|--------------------------------------|----------------------------------|
| PP                        | 4.08                                 | 0.01                             |
| PP-AM-HBP-NH <sub>2</sub> | 5.82                                 | 0.01                             |

### Ultra-depth three-dimensional microscope images

A fibrous adsorbent with amino-terminated hyperbranched structure (PP-AM-HBP-NH<sub>2</sub>) was prepared by grafting hyperbranched polyamine (HBP-NH<sub>2</sub>) onto the acrylamide-modified polypropylene fibres (PP-AM). During the grafting of AM onto PP fibers, AM copolymerized with PP to form PP-AM copolymers with polyamide oligomer as side chains, which provided abundant active sites for introducing HBP-NH<sub>2</sub> onto the PP fibers. The diameter of the PP-AM (the grafting degree was 320%) thus was increased to 95.52 μm. And then its diameter further increased to 116 μm after grafting HBP-NH<sub>2</sub> onto PP-AM (Figure S1). Meanwhile, the nitrogen content of PP-AM-HBP-NH<sub>2</sub> has an increment of 6.31 wt% from 12.14 wt% (PP-AM) to 18.45 wt% (Figure 4).

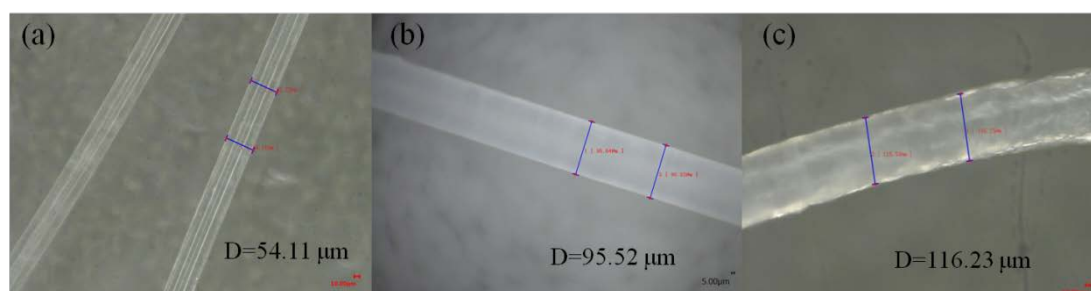

Figure S1 Ultra-depth three-dimensional microscope images of PP (a), PP-AM (b), and PP-AM-HBP-NH<sub>2</sub> (c) under dry conditions

## Comparison of CO<sub>2</sub> adsorption capacity of amine functionalized fibrous

Compared with PEI modified fibrous adsorbents (PP-AM-PEI<sup>10</sup>, PP-GMA-PEI<sup>10</sup>, GF-ECH-PEI<sup>11</sup>, VF-PEI<sup>S1</sup>) reported (Table S4), PP-AM-HBP-NH<sub>2</sub> adsorption fibers showed relatively high adsorption efficiency. More interestingly, Wu<sup>10</sup> has prepared a fibrous adsorbent (PP-AM-PEI) through grafting AM onto PP fibers, followed by reaction with PEI. Though PP-AM-PEI had a similar adsorption capacity with PP-AM-HBP-NH<sub>2</sub> adsorption fibers, its amino utilization efficiency (56.0 %) was much lower than that of PP-AM-HBP-NH<sub>2</sub>, further highlighting the superiority of PP-AM-HBP-NH<sub>2</sub> adsorbent.

Table S4 Comparison of CO<sub>2</sub> adsorption capacity of PEI and HBP-NH<sub>2</sub> functionalized fibrous sorbents

| Substrate* | Grafted monomer** | Amine               | Adsorption capacity (mmol/g) | Amino utilization efficiency (%) | Ref.      |
|------------|-------------------|---------------------|------------------------------|----------------------------------|-----------|
| PP         | AM                | HBP-NH <sub>2</sub> | 5.64                         | 88.2                             | This work |
| PP         | AM                | PEI                 | 5.91                         | 56.0                             | 10        |
| PP         | GMA               | PEI                 | 2.51                         | 26.9                             | 10        |
| GF         | ECH               | PEI                 | 4.12                         | 57.0                             | 11        |
| VF         |                   | PEI                 | 4.11                         | 29.38                            | S1        |

\* GF: glass fibers, VF: viscose fibers, \*\* ECH: epichlorohydrin, GMA: glycidyl methacrylate. Adsorption temperature: 25 °C, CO<sub>2</sub> concentration: 10%.

## REFERENCES

S1 He. H. et al. The Oxidation of Viscose Fiber Optimized by Response Surface Methodology and Its Further Amination with PEI for CO<sub>2</sub> Adsorption. *Cellulose* **23**, 2539-2548 (2016).
